# Supplementary material for: Properties and units in the clinical laboratory sciences. Part XXVIII. NPU codes for characterizing subpopulations of the hematopoietic lineage, described from their clusters of differentiation molecules (IUPAC Technical Report)
Source: publisher site journal article supplement (doi:10.1515/pac-2023-0806), 2024-09-24
Supplement: Supplementary file 1 [file j_pac-2023-0806_suppl_001.pdf]

January 24, 2022

Dr. Evita Maria Lindholm  
The Norwegian Directorate of eHealth  
Postal Address: Pb. 221 Skøyen  
0213 Oslo  
Norway

**RE: APPROVAL OF PROJECT TITLED “NPU CODES FOR CHARACTERIZING SUBPOPULATIONS OF THE HEMATOPOIETIC LINAGE, DESCRIBED FROM THEIR CLUSTERS OF DIFFERENTIATION (CD) MARKERS” (#2021-022-1-700)**

Dear Dr. Lindholm:

The Chemistry and Human Health Division (Div VII) has reviewed the proposal titled “NPU codes for characterizing subpopulations of the hematopoietic linage, described from their Clusters of Differentiation (CD) markers” and has approved this project. The total sum of USD 5000 has been allocated for the project over its lifetime of two years, starting immediately.

Please be aware that Technical Reports and Recommendations resulting from IUPAC Projects should normally be published in *Pure and Applied Chemistry*, although I acknowledge that in this case there may be a different plan. The Bureau has established a procedure to allow publication in other journals in exceptional circumstances where it can be demonstrated by the Task Group and the Division or Standing Committee that publication in another journal is in the best interests of IUPAC. Approval for such an exception should be requested by the Division President from the Secretary General. This request should of course explain why publication in another journal would be preferable to publication in *Pure and Applied Chemistry*.

Please send requests for Claim Forms to receive payment for project expenses to the IUPAC Secretariat; see the following page for instructions <[www.iupac.org/projects/claim-of-expenses/](http://www.iupac.org/projects/claim-of-expenses/)>. As Task Group Chair, you are responsible for the approval and monitoring of all expenses associated with your project. You also have the autonomy to appoint Task Group Member(s), while duly informing the Secretariat. Additional information for Task Group Chairs has been compiled and a copy is enclosed for your records.\*

Correspondence regarding the technical aspects of the project should be with the Chemistry and Human Division.

Thank you for your contribution to IUPAC work.

With all best wishes,

A handwritten signature in blue ink, appearing to read 'R. M. Hartshorn', followed by a horizontal line.

Prof. Richard Hartshorn  
Secretary General

cc: Dr. Helle M. Johannessen, Prof. Rita Cornelis, Prof. Vladimir Gubala, Dr. Fabienne Meyers

encl – also available at [www.iupac.org/projects/information-for-task-group-chairs/](http://www.iupac.org/projects/information-for-task-group-chairs/)
